# Supplementary material for: Continuous national gross domestic product (GDP) time series for 195 countries: past observations (1850–2005) harmonized with future projections according to the Shared Socio-economic Pathways (2006–2100)
Source: Copernicus journal article supplement (doi:10.5194/essd-10-847-2018), 2018-04-27
Supplement: Supplementary file 1 [file essd-10-847-2018-supplement.pdf]

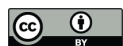

## *Supplement of*

# **Continuous national gross domestic product (GDP) time series for 195 countries: past observations (1850–2005) harmonized with future projections according to the Shared Socio-economic Pathways (2006–2100)**

**T. Geiger**

*Correspondence to:* Tobias Geiger ([geiger@pik-potsdam.de](mailto:geiger@pik-potsdam.de))

The copyright of individual parts of the supplement might differ from the CC BY 4.0 License.



Overview of all countries

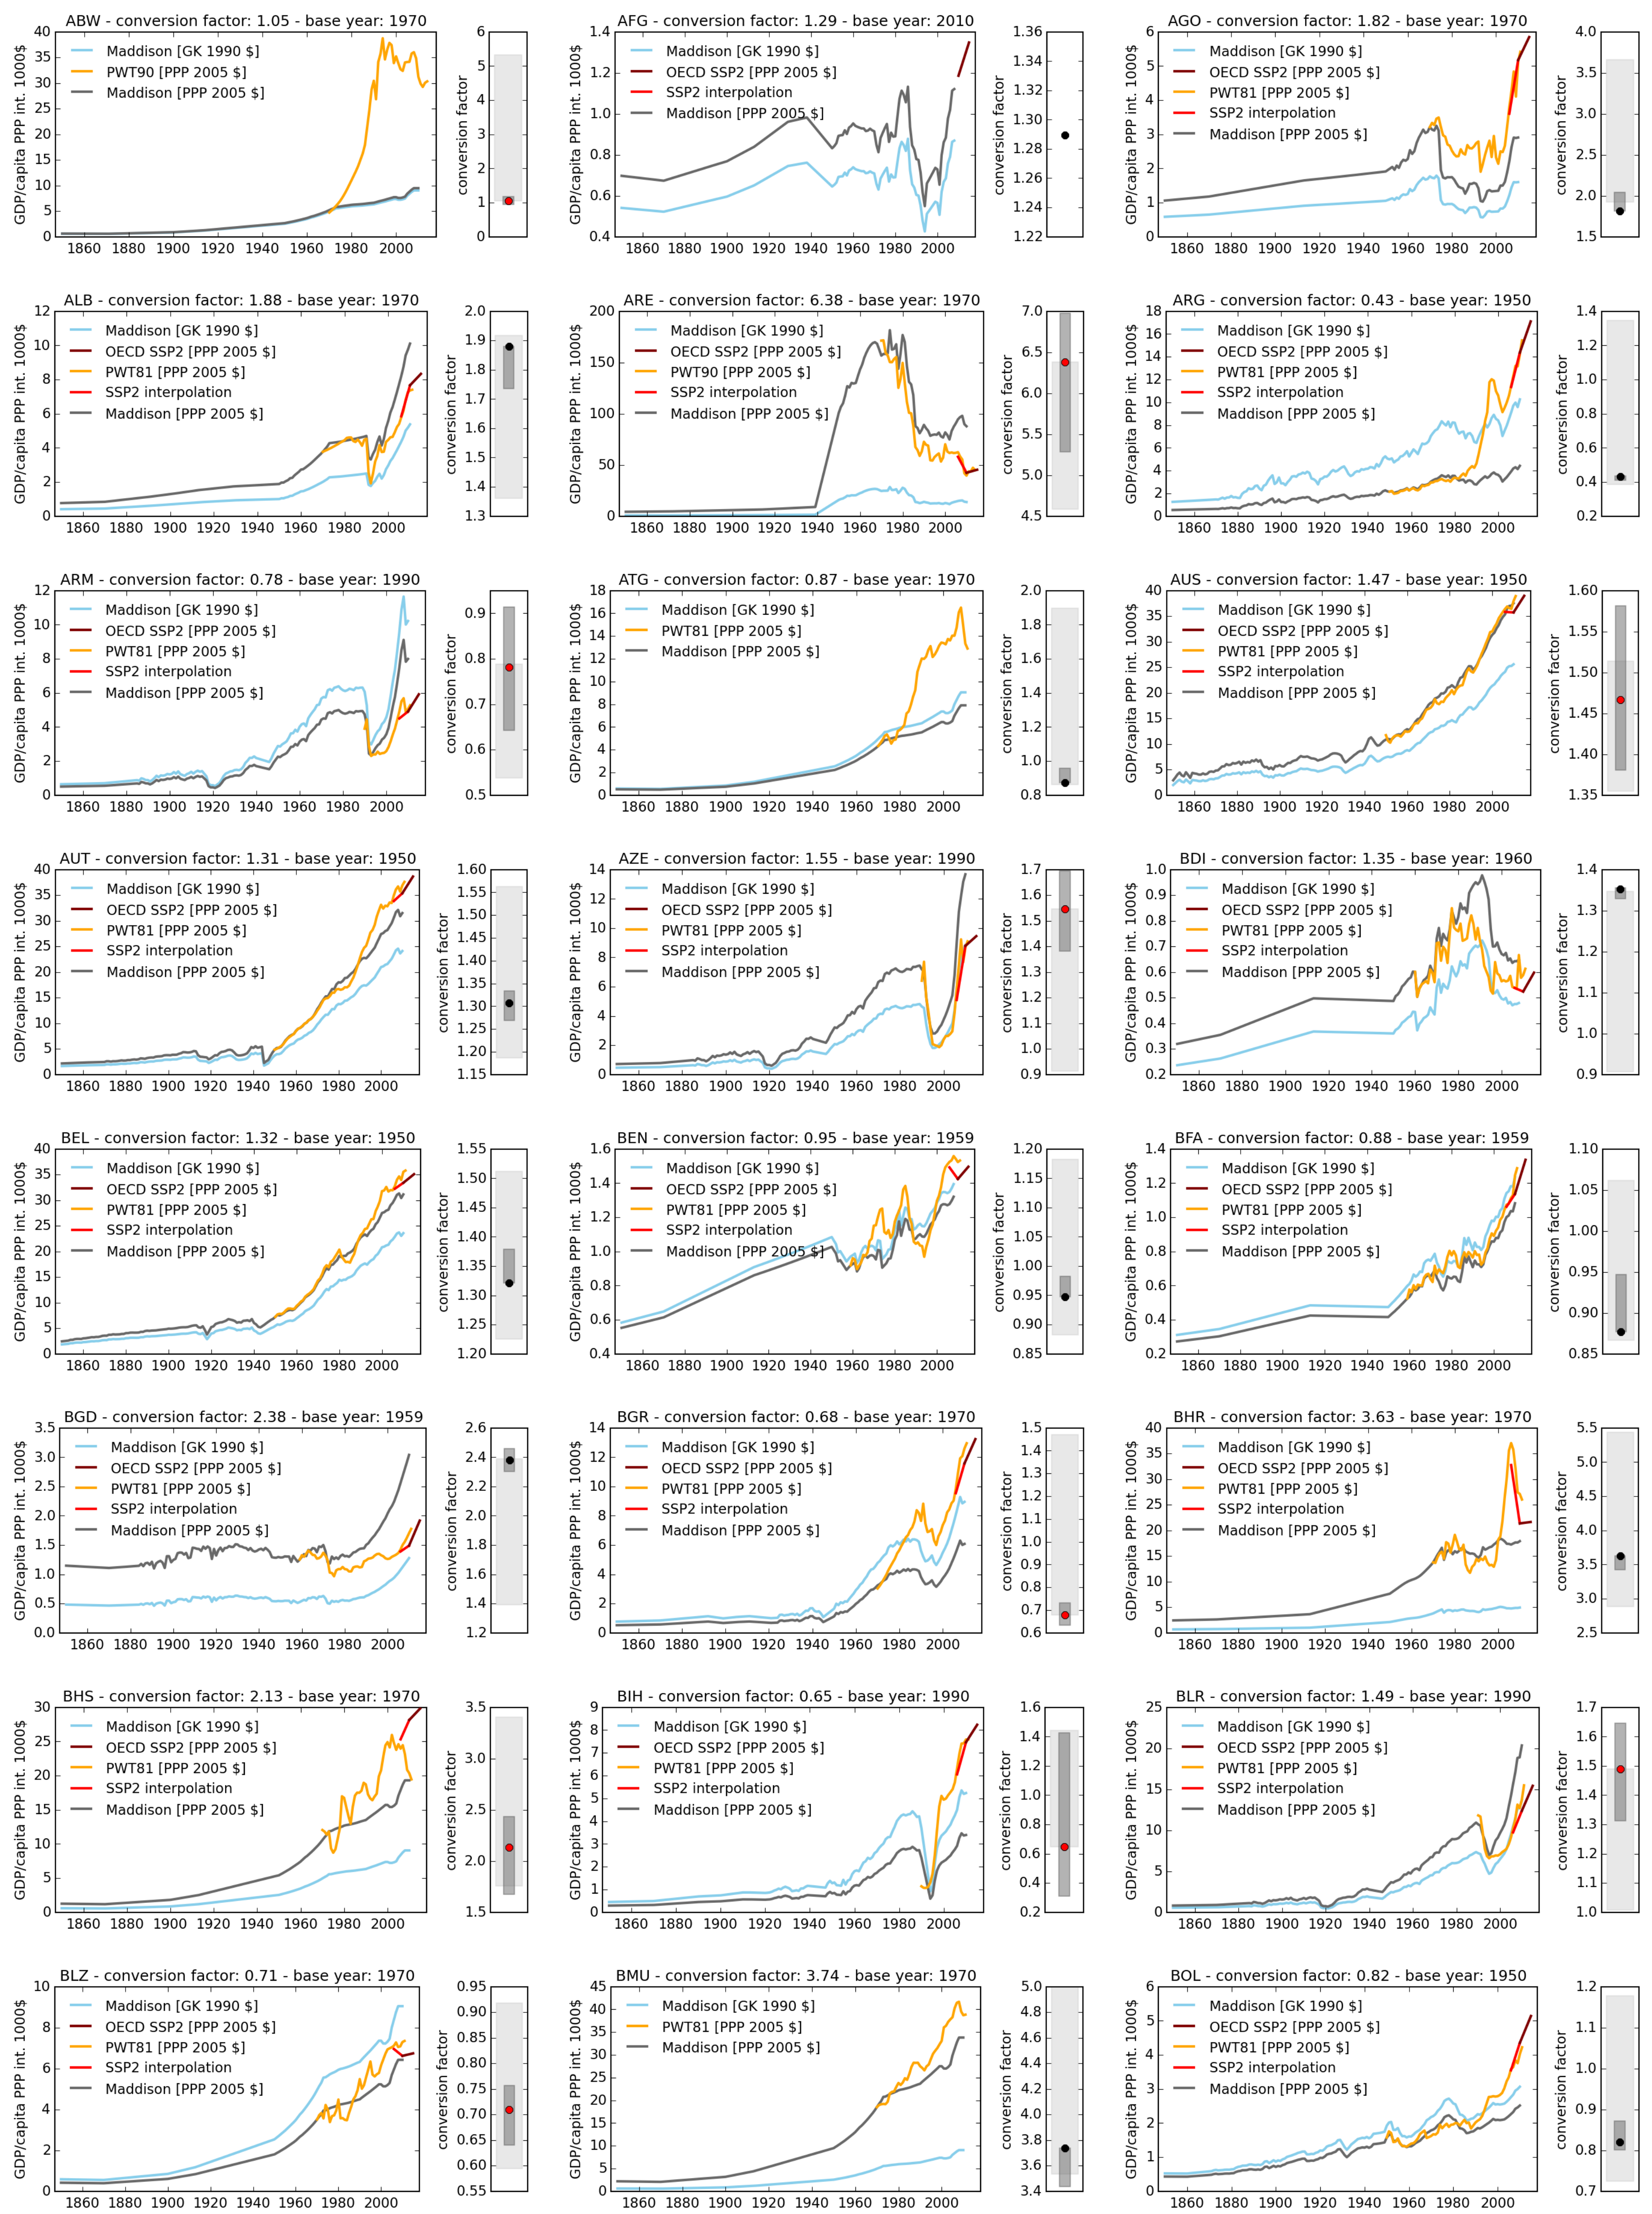

Figure S1: see last page for details.



Overview of all countries (cont'd)

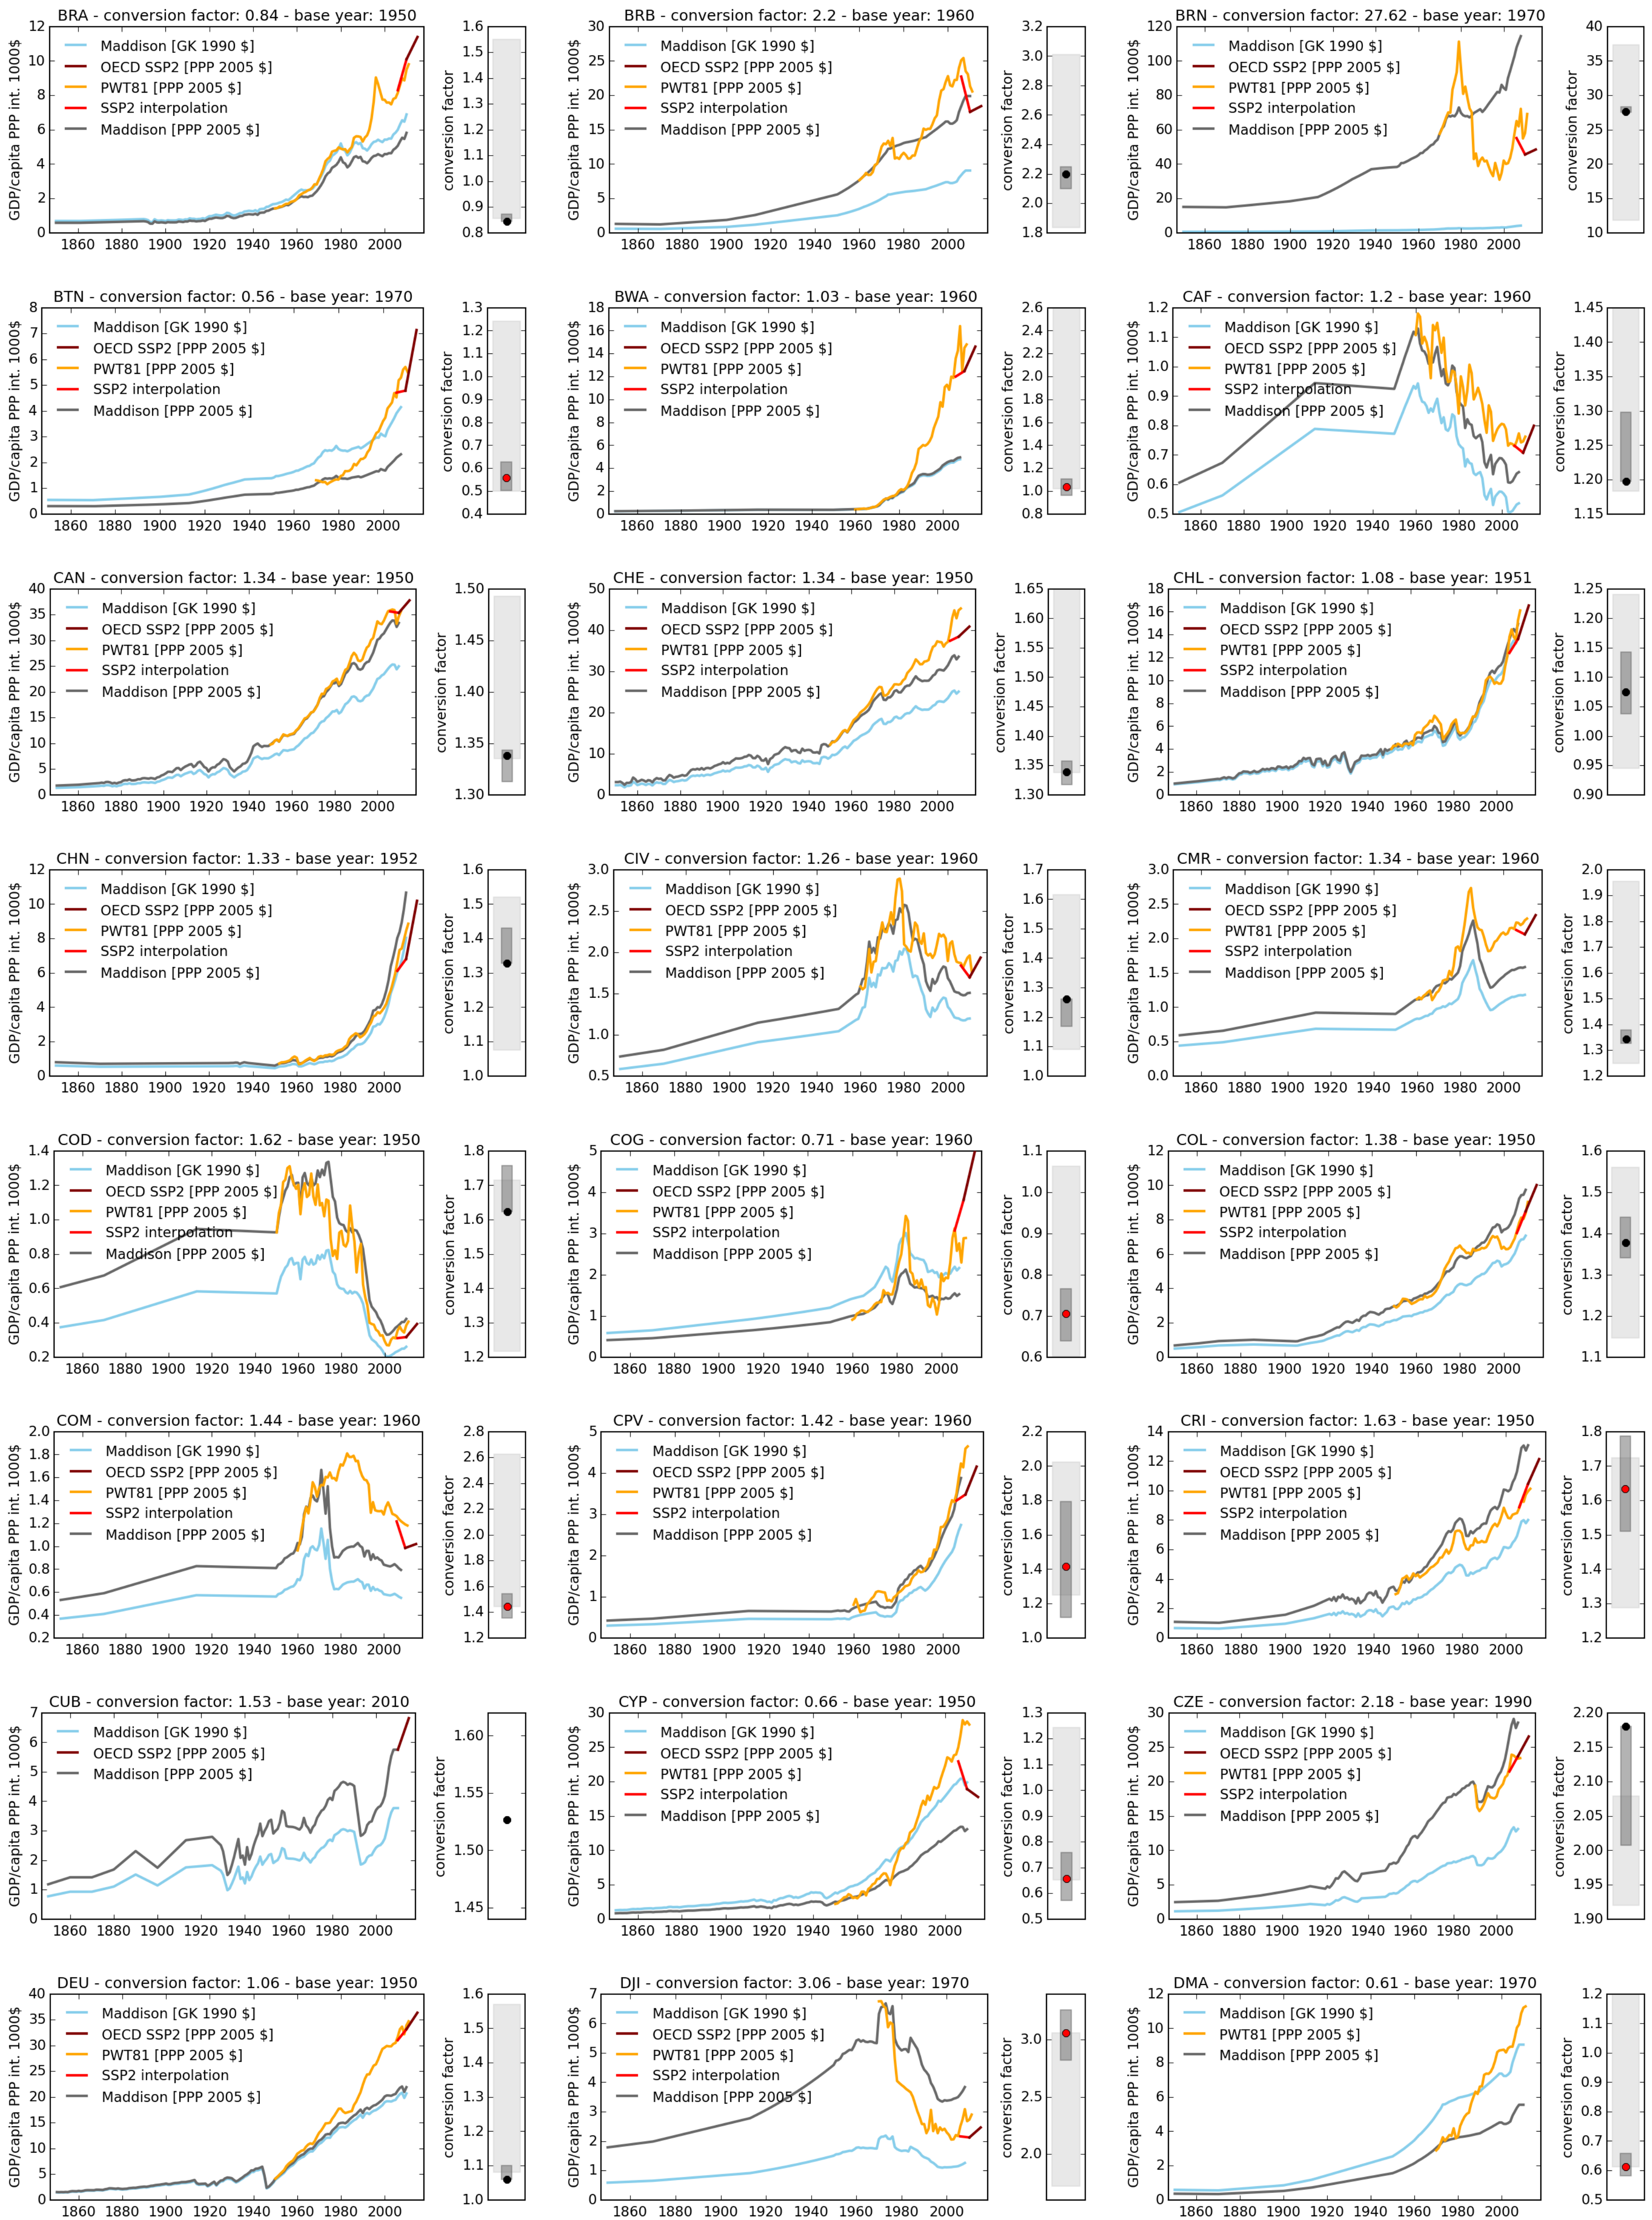

Figure S1: see last page for details.



Overview of all countries (cont'd)

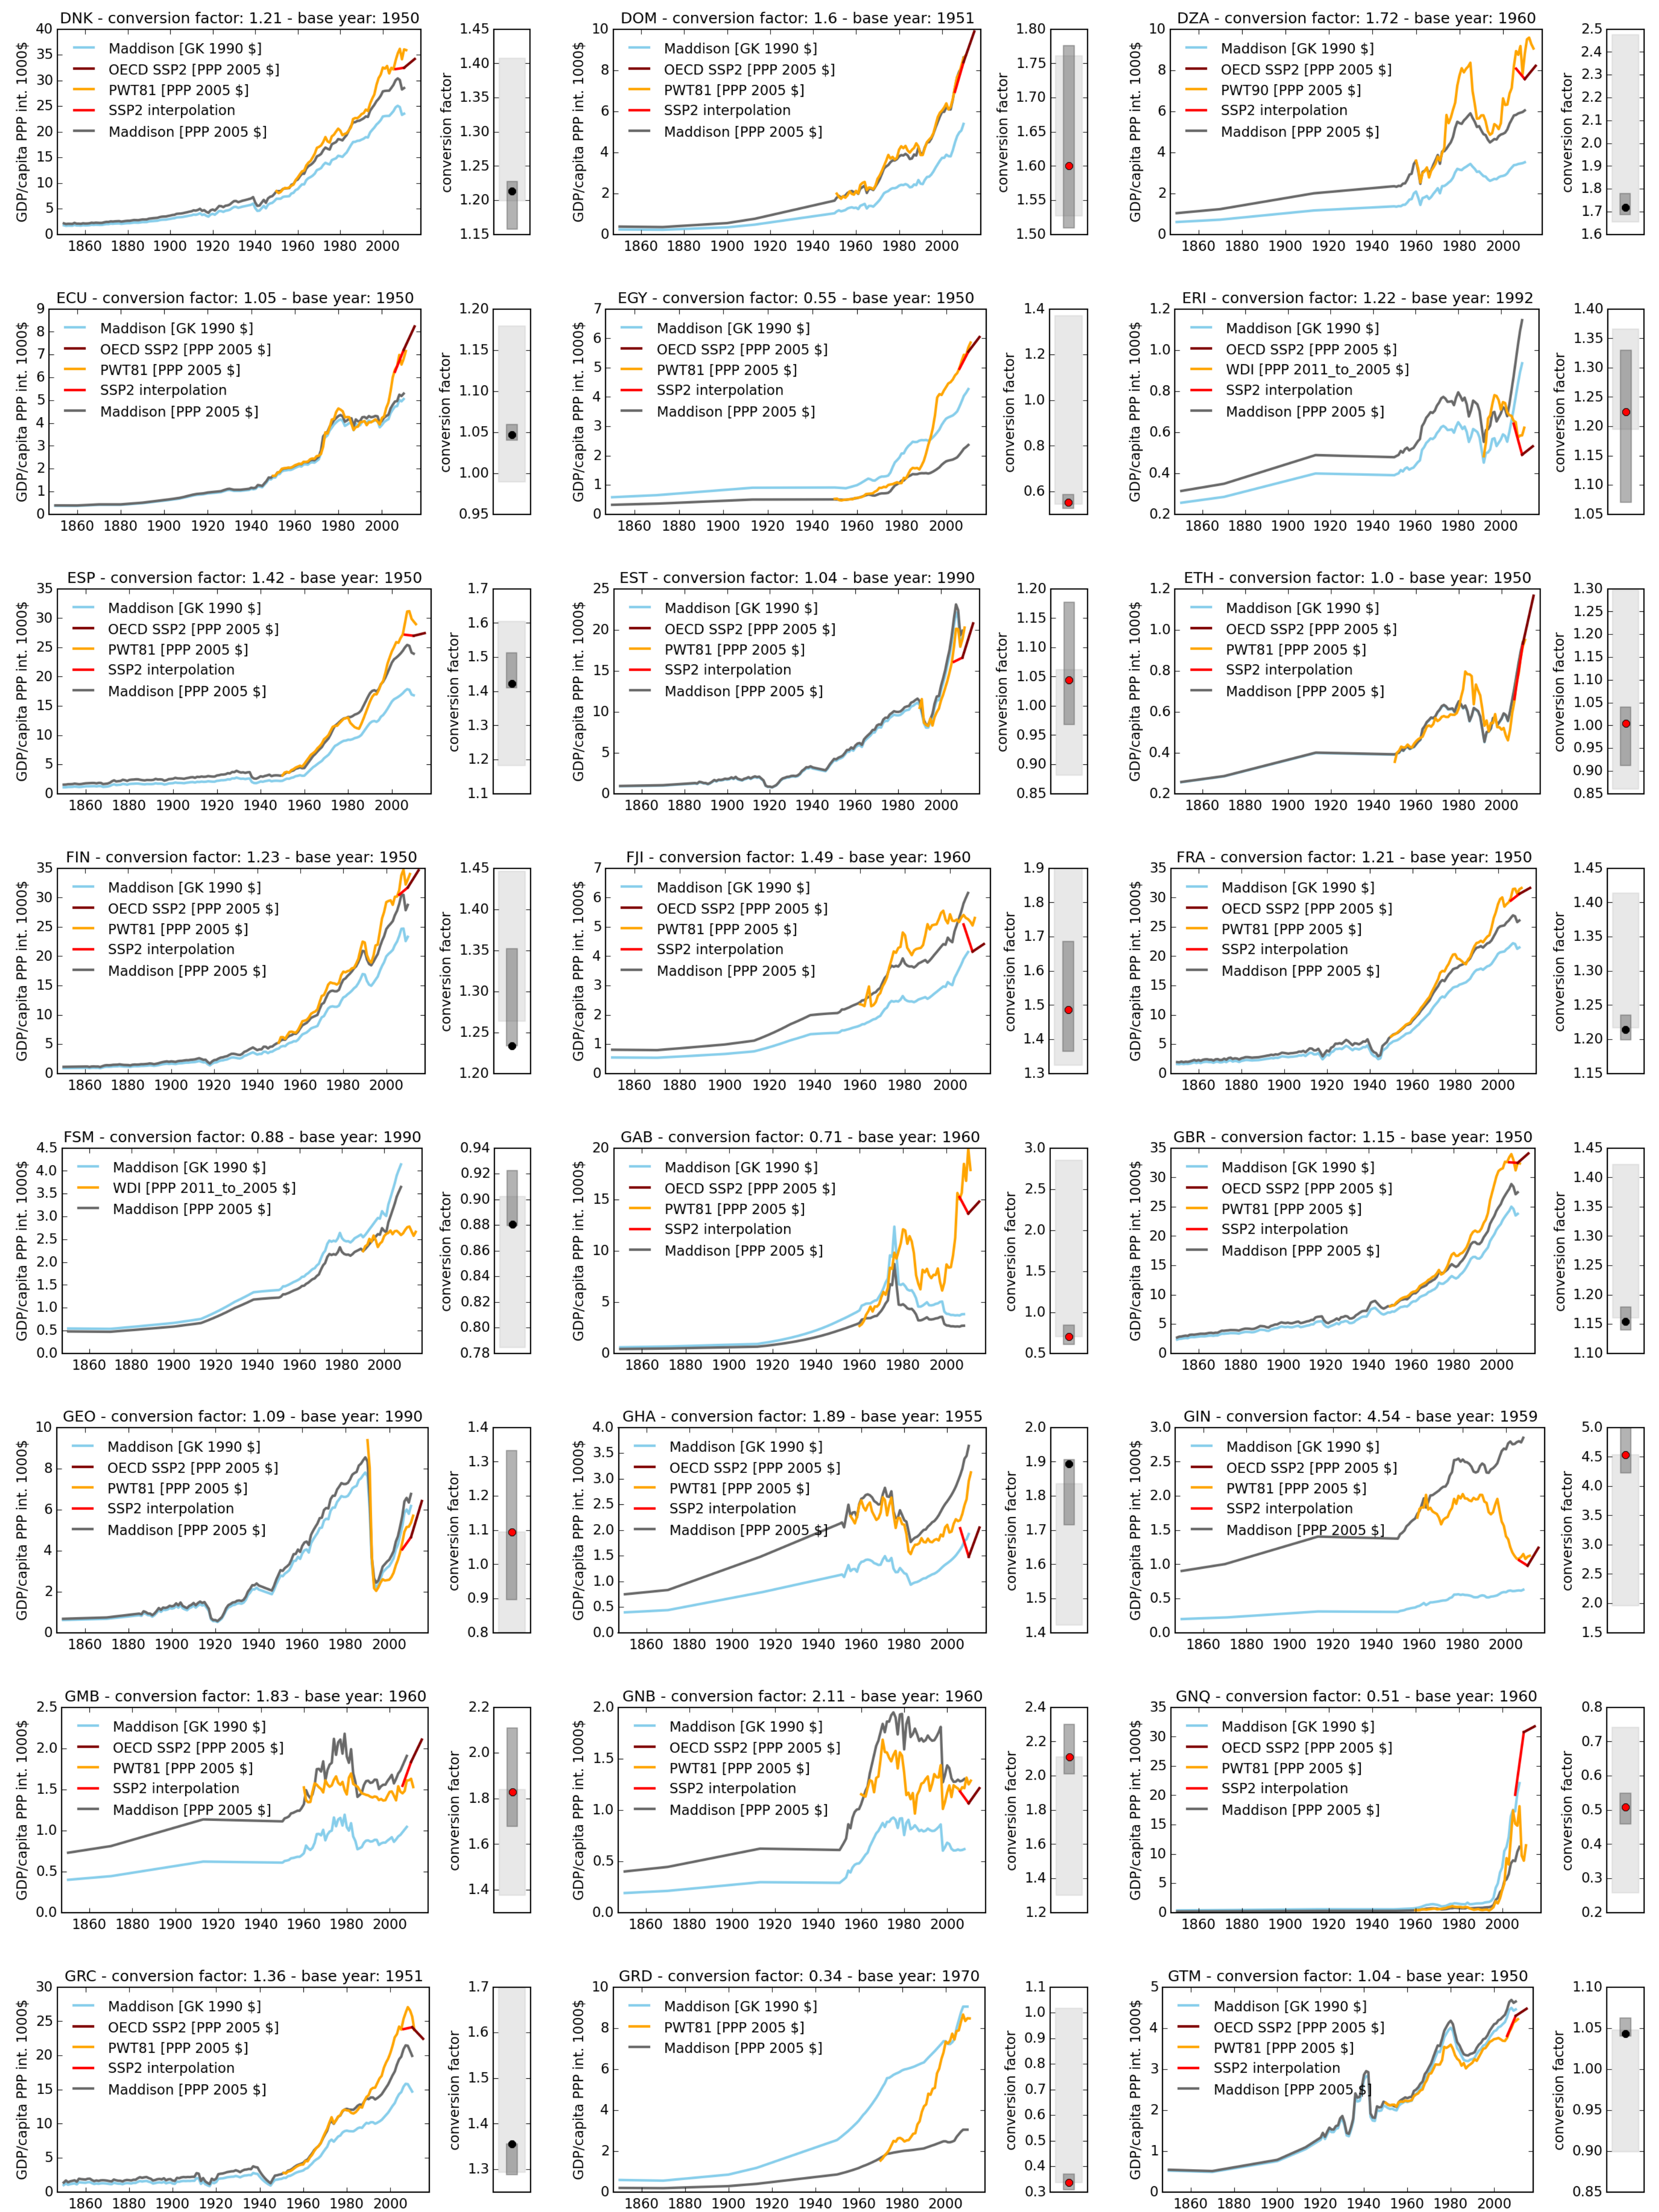

Figure S1: see last page for details.



# Overview of all countries (cont'd)

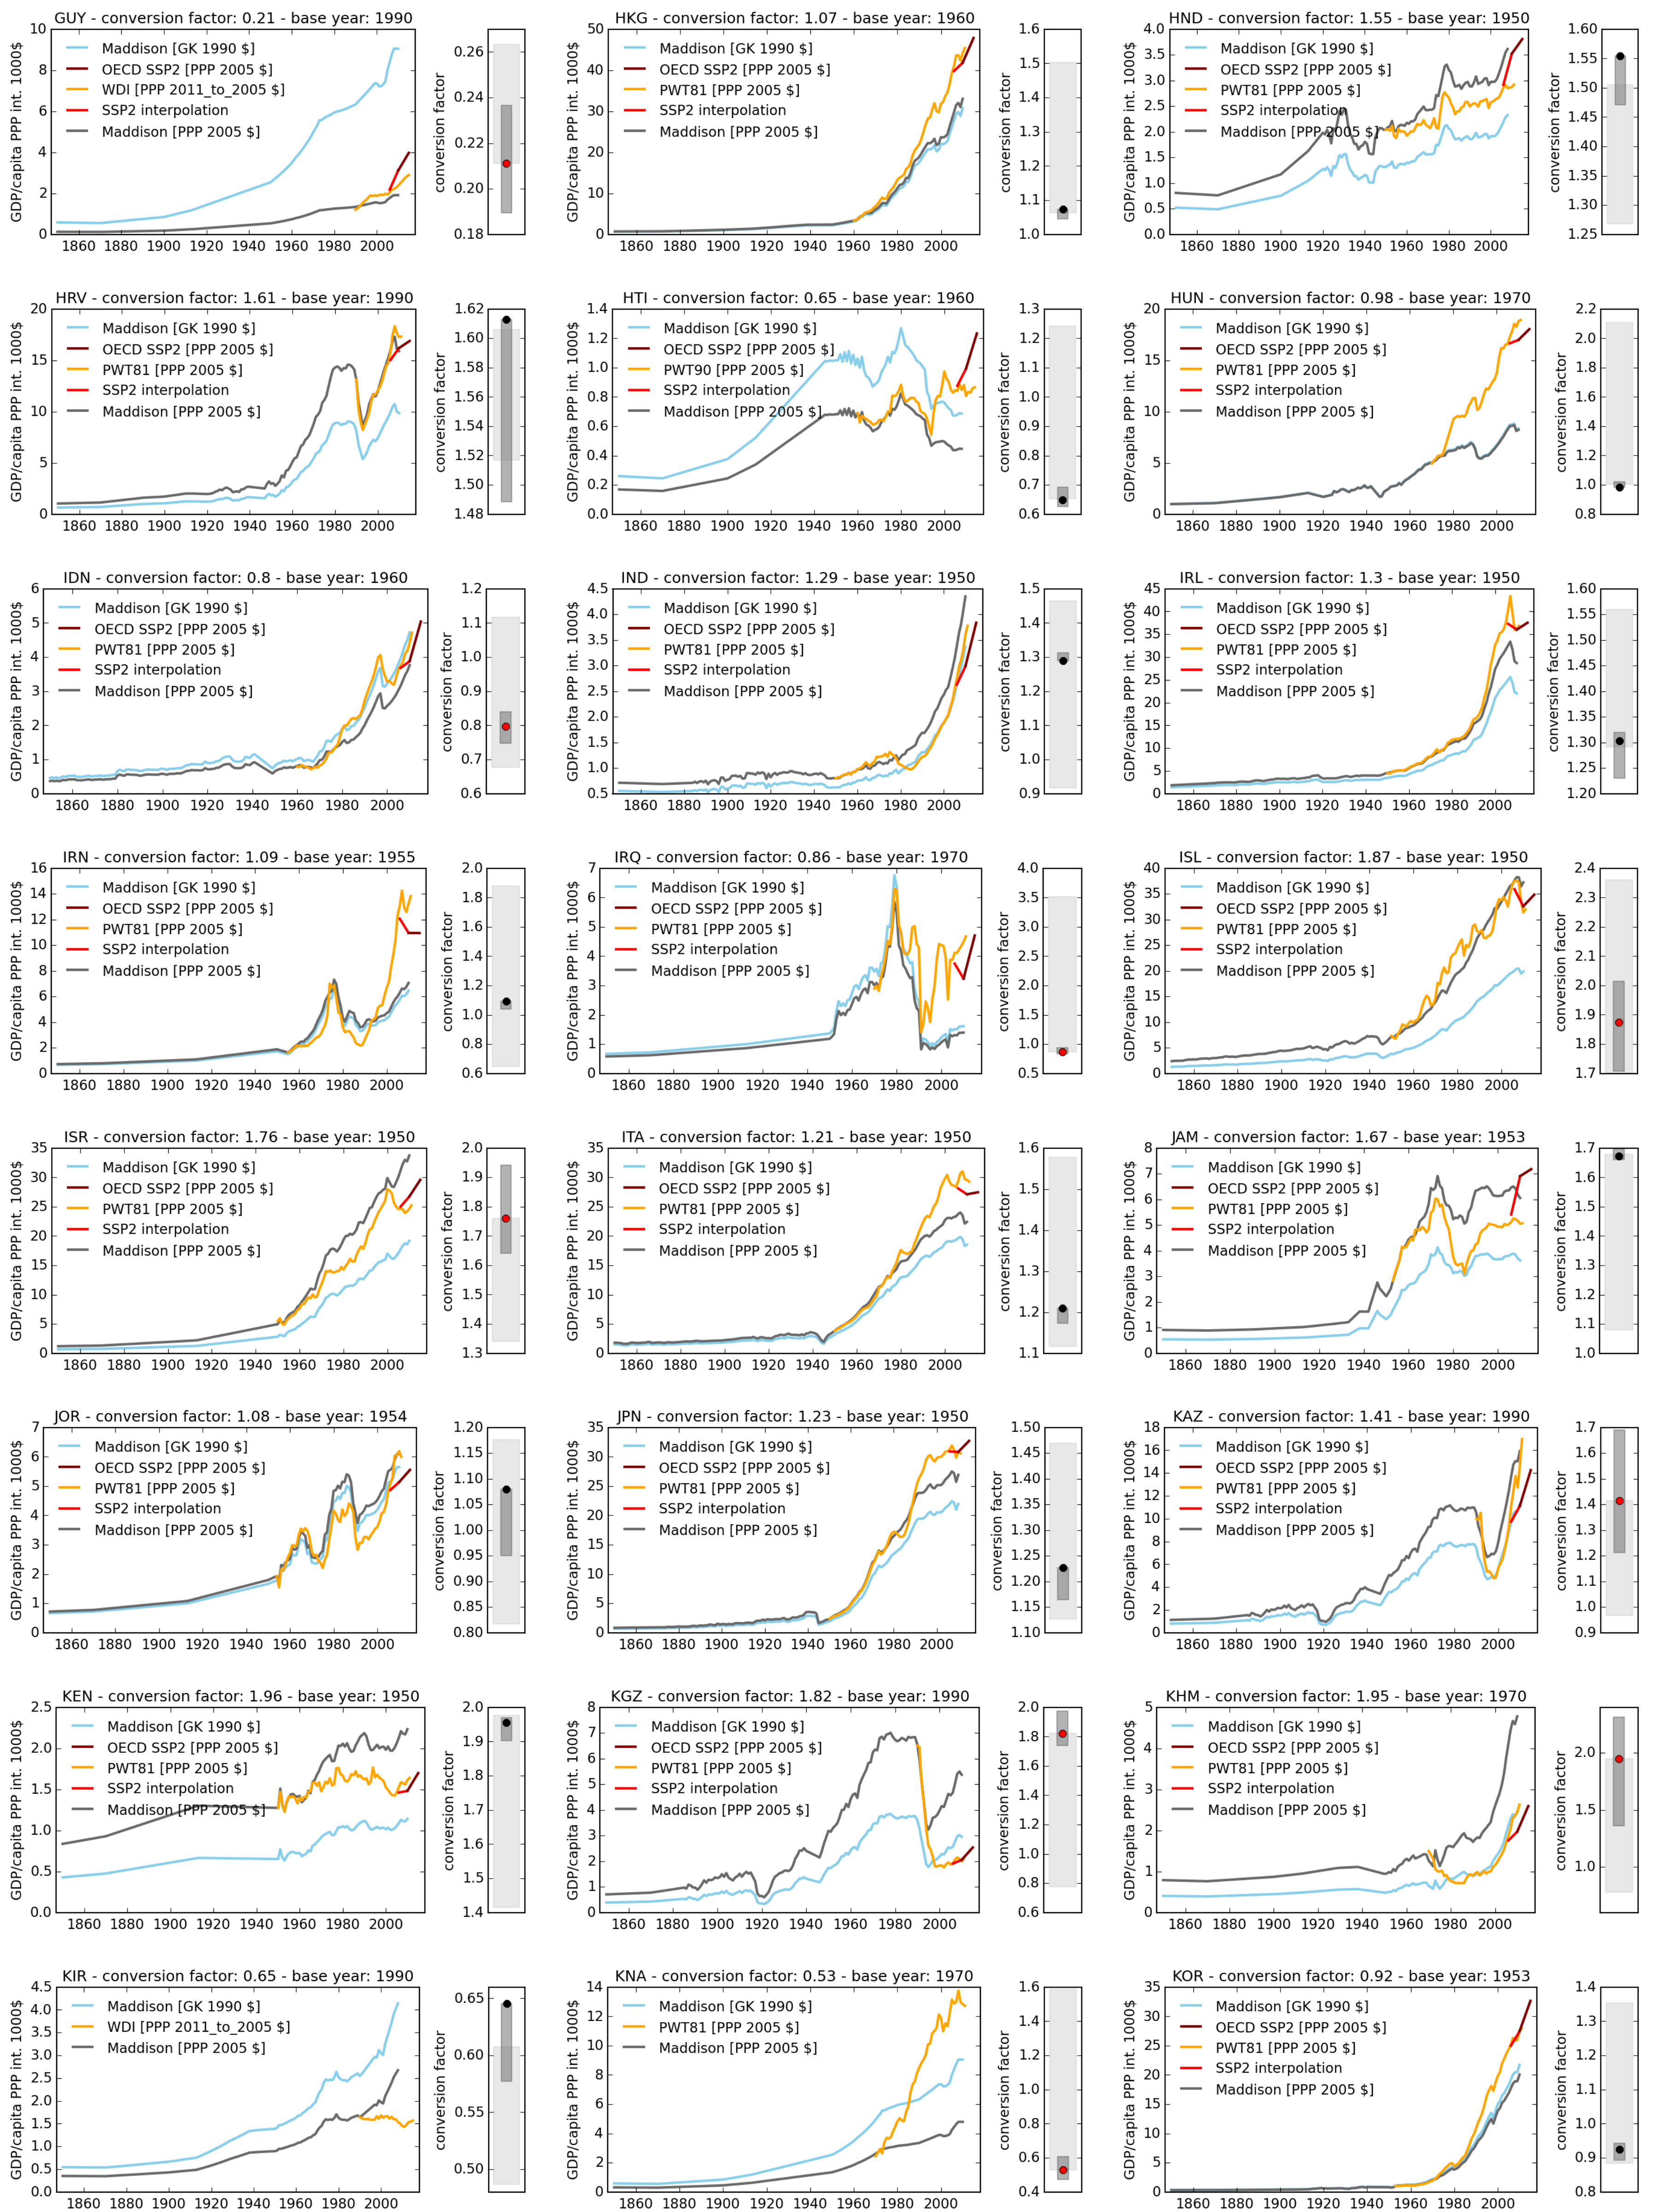

Figure S1: see last page for details.



Overview of all countries (cont'd)

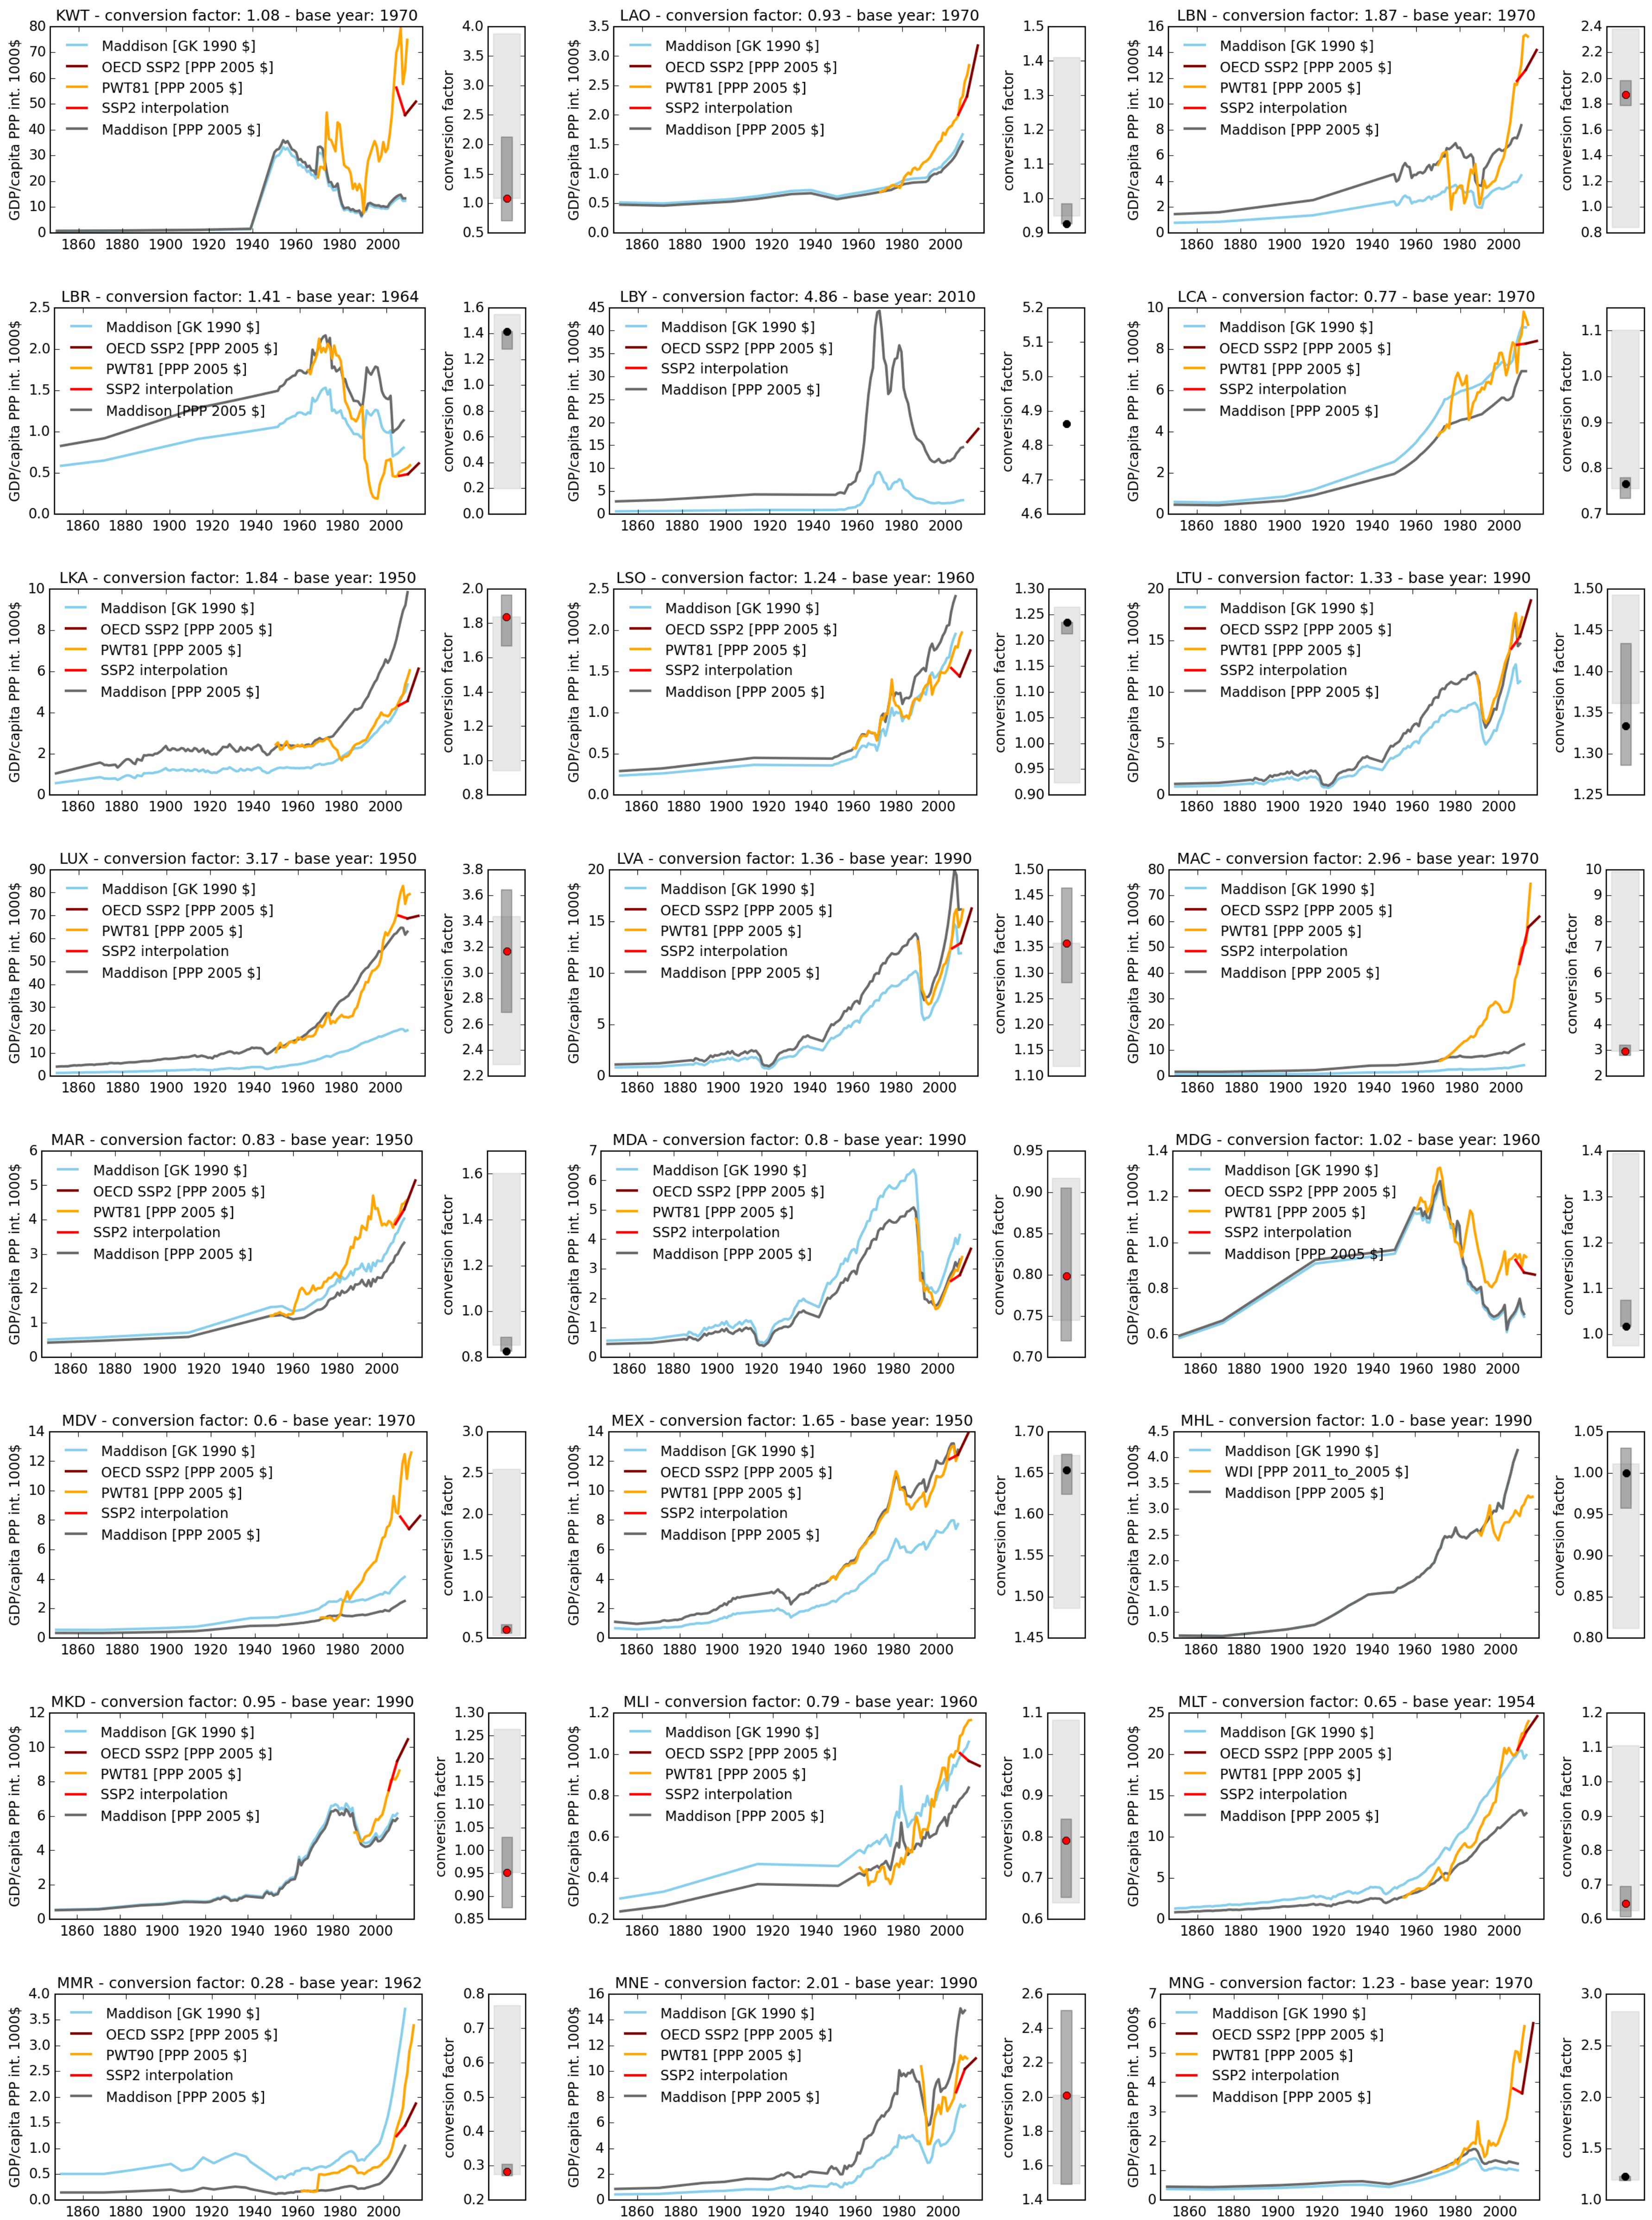

Figure S1: see last page for details.



# Overview of all countries (cont'd)

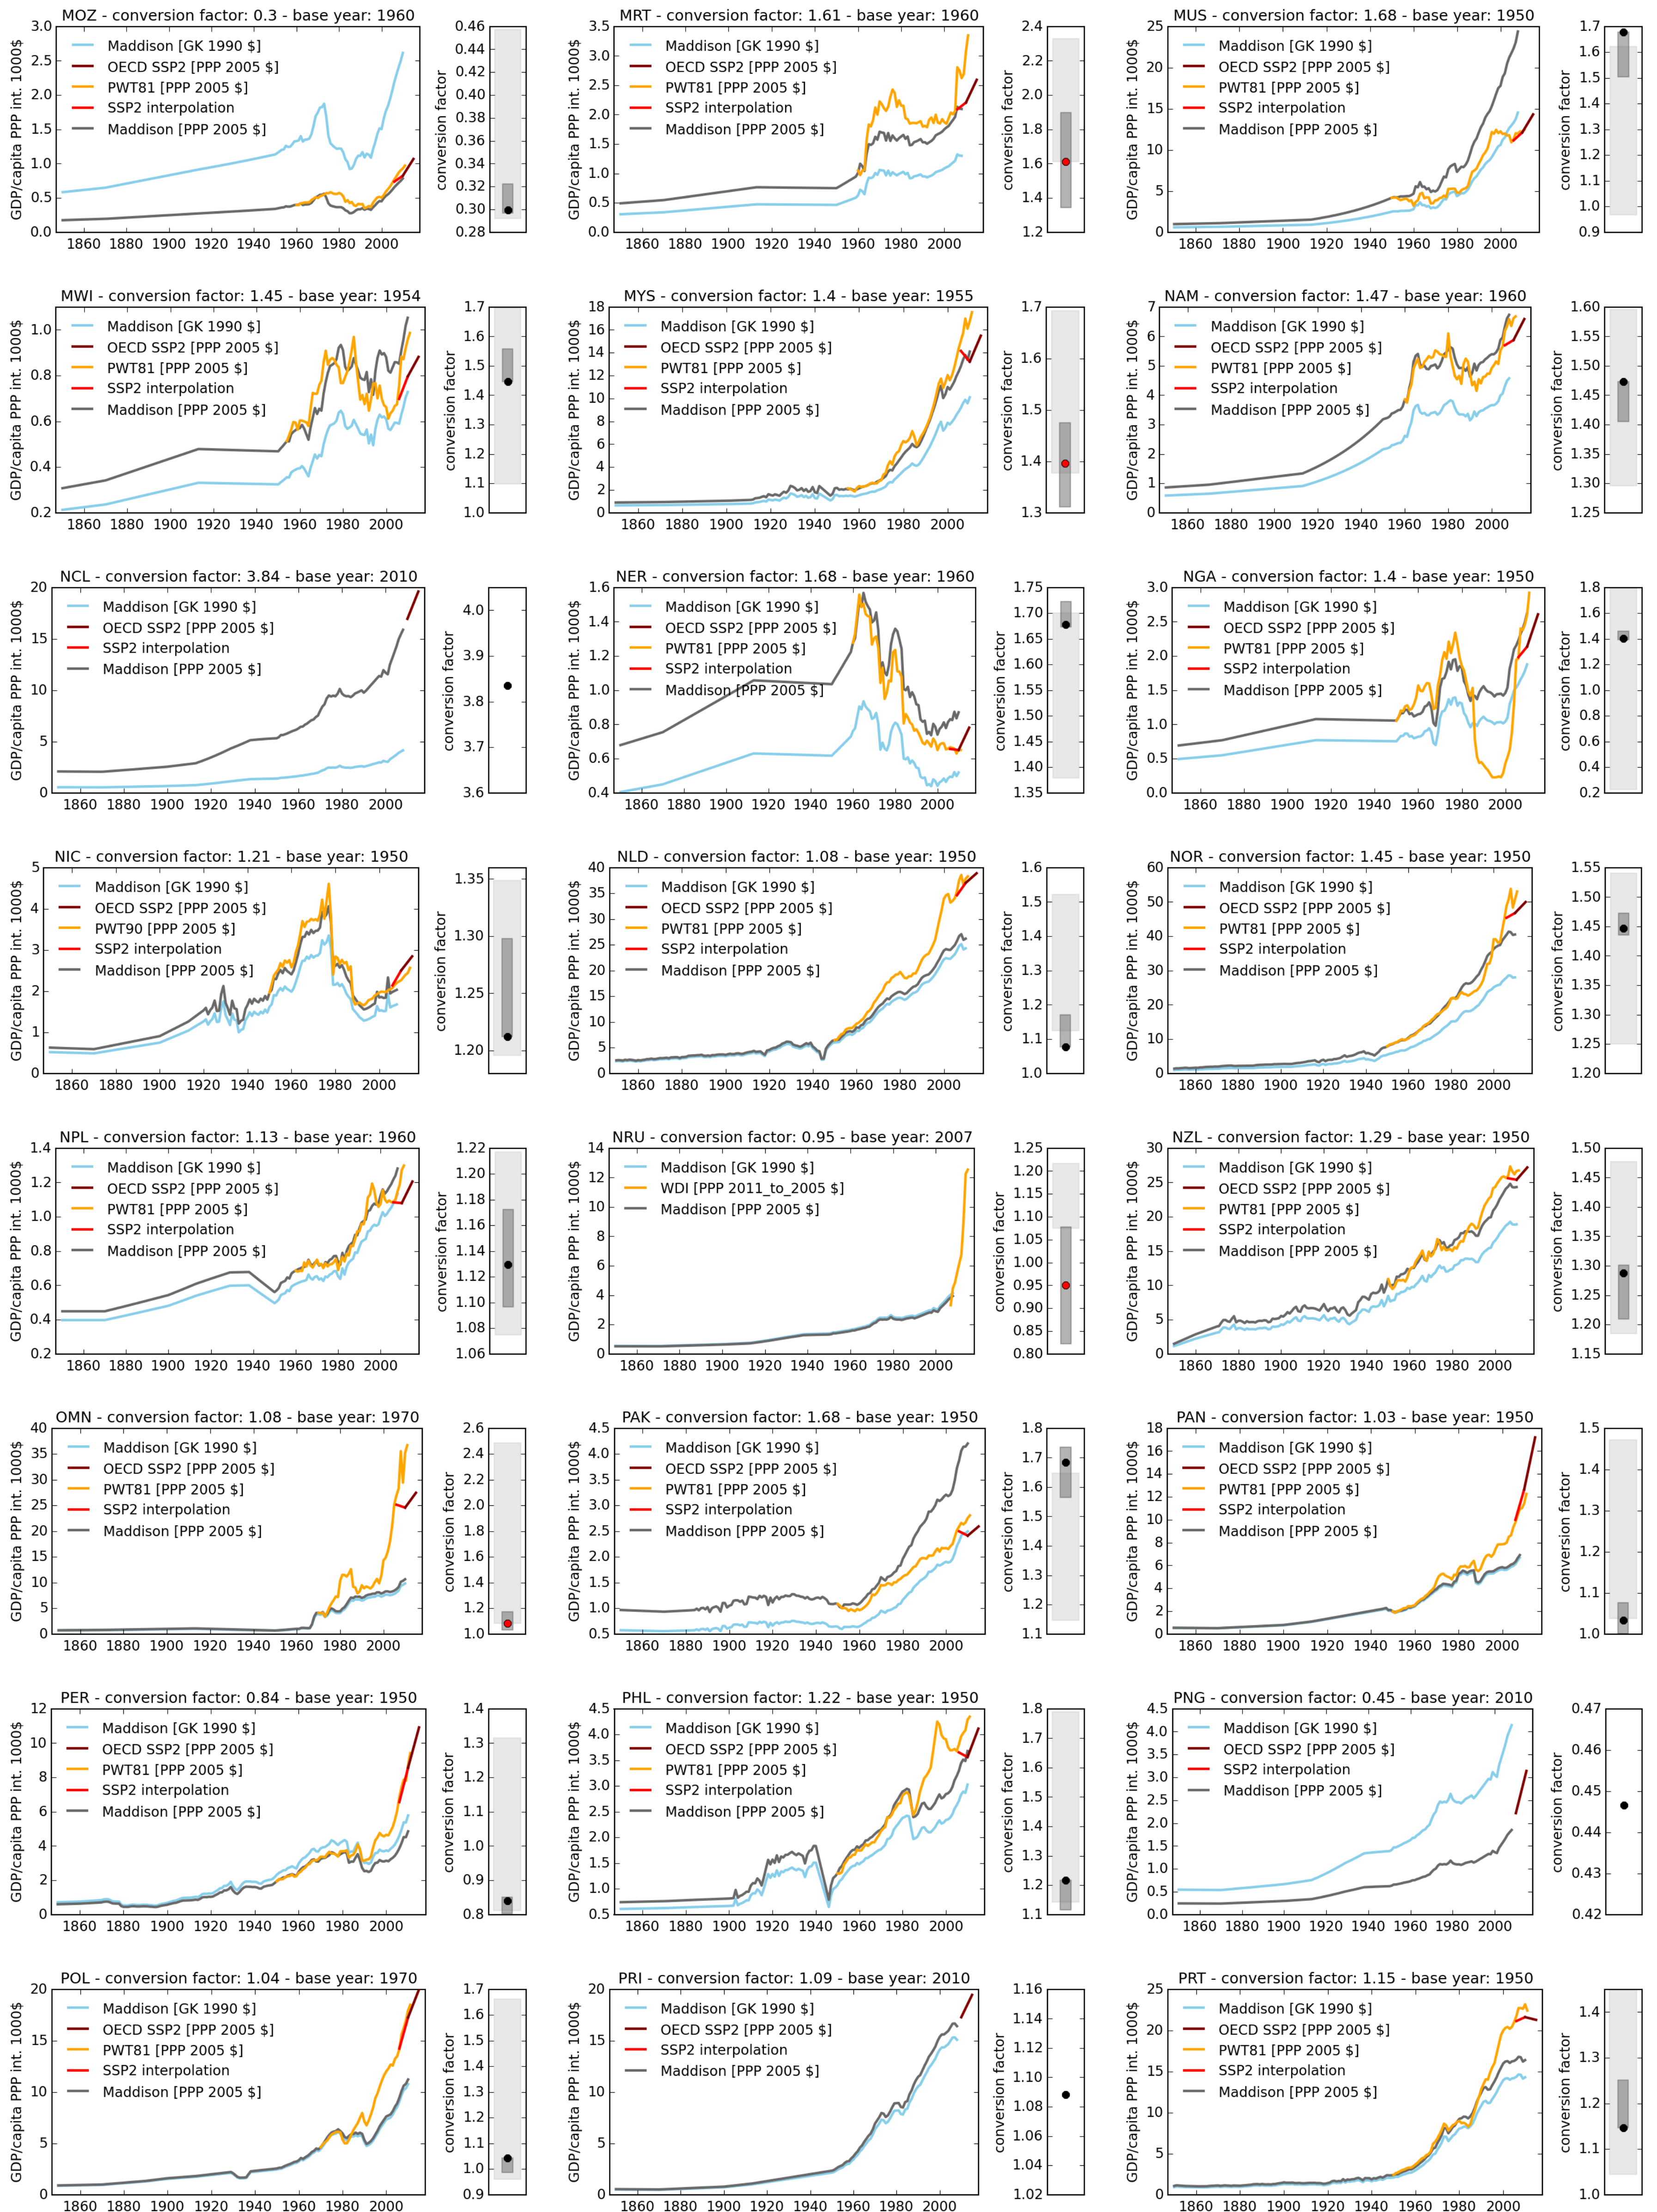

Figure S1: see last page for details.



Overview of all countries (cont'd)

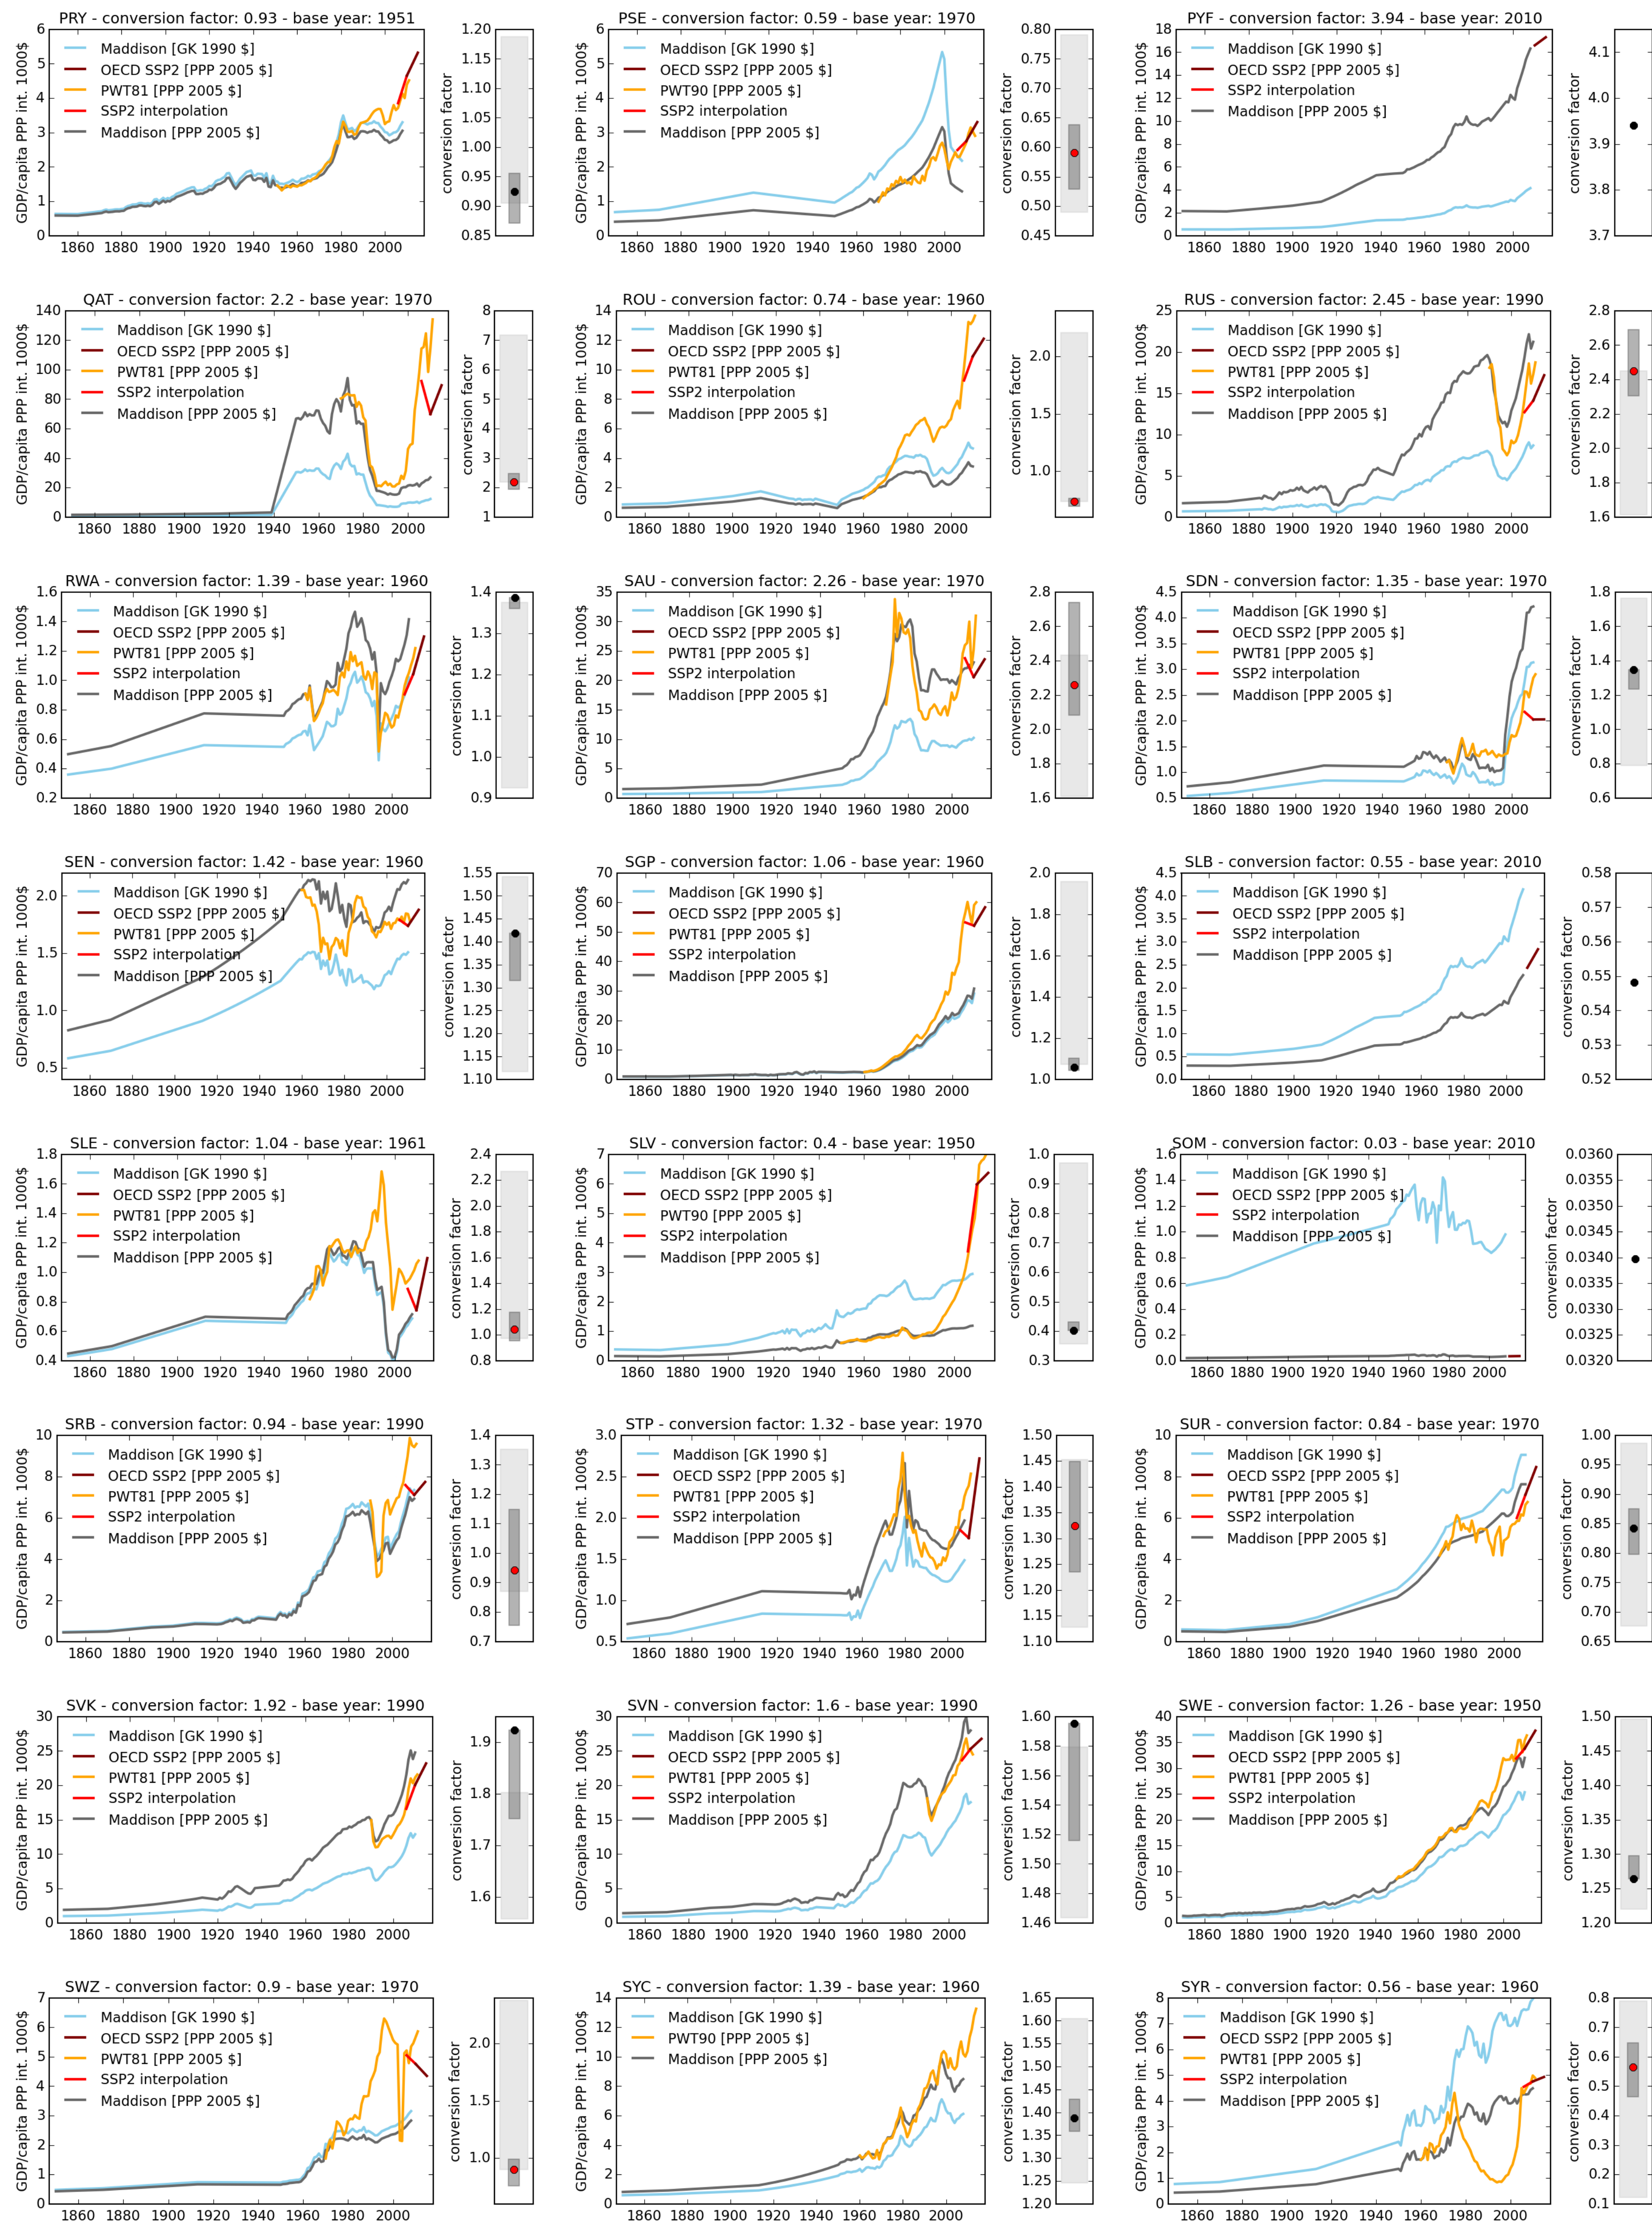

Figure S1: see last page for details.



# Overview of all countries (cont'd)

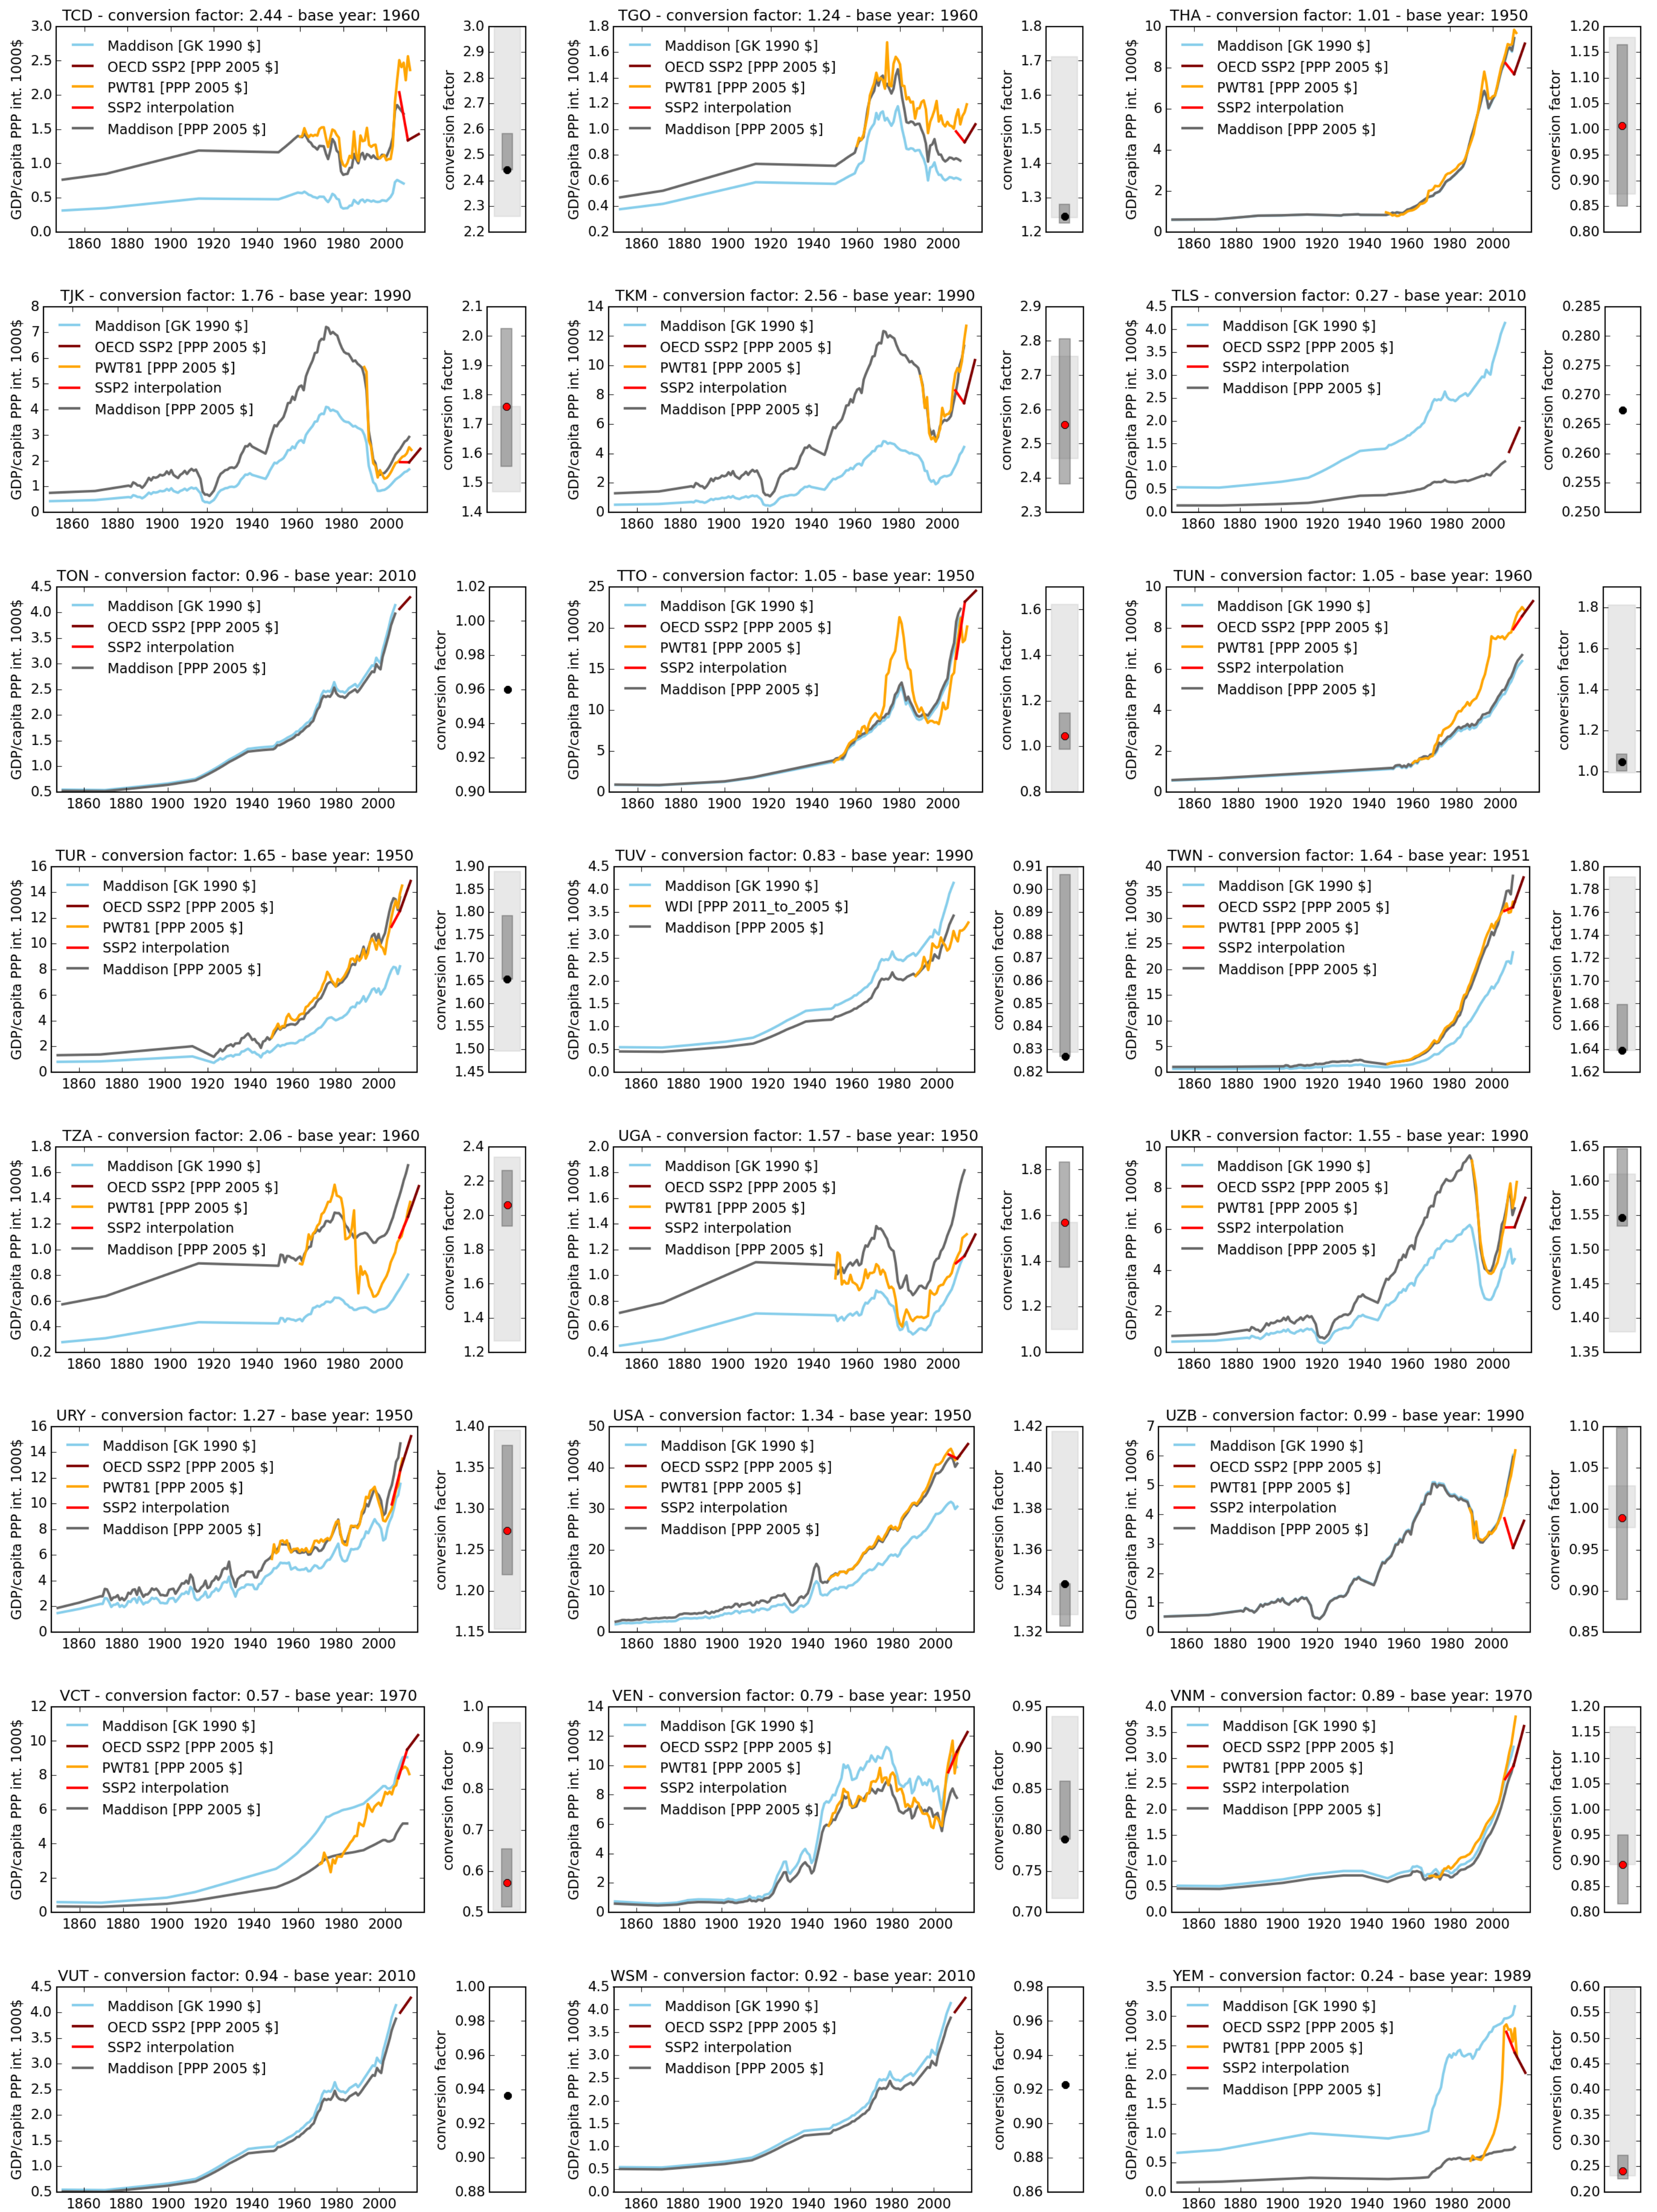

Figure S1: see last page for details.



# Overview of all countries (cont'd)

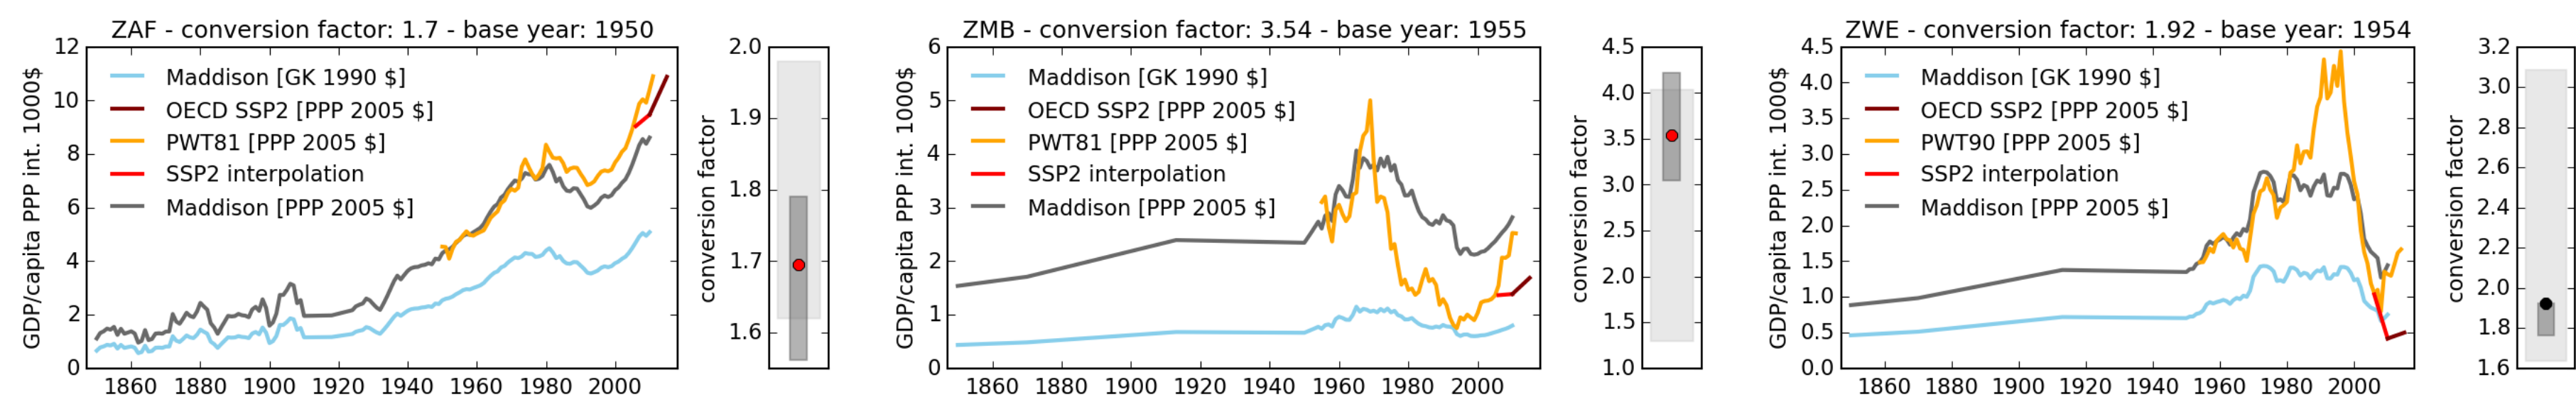

**Figure S1: Results of matched GDP per capita time series for Maddison, PWT, and OECD SSP2 data for all countries. Original Maddison data (blue, in 1990 GK \$) is matched to PWT data (yellow, in 2005 PPP \$) using a country-specific base year and conversion factor, to obtain converted Maddison data (gray, in 2005 PPP \$). Between 2006 and 2009, PWT data is interpolated (red) to match OECD SSP2 projections (maroon) starting in 2010. The sensitivity of the conversion factor over time is displayed to the right of each income time series. The black (red) point indicates whether the selected conversion factor was chosen based on the first overlapping year (5-year mean), while the dark gray and light gray shaded areas show the conversion factor min/max range for the first 5 overlapping years and for the 5-year running mean between the base year and 2005, respectively.**
